# Supplementary material for: Combining Remote Sensing and a Geographic Information System to Map and Assess the Accessibility of Invasive Alien Species Forest Stands: Case of Acacia mearnsii on Reunion Island
Source: MDPI journal article supplement (doi:10.3390/f14102030), 2023-10-10
Supplement: s1 [file s1]

**Table S1.** Characteristics of training and validation datasets.

| Training Dataset |          |                             | Validation Dataset |                             |
|------------------|----------|-----------------------------|--------------------|-----------------------------|
| Class            | <i>n</i> | Mean size (m <sup>2</sup> ) | n                  | Mean size (m <sup>2</sup> ) |
| Shade            | 52       | 9.87                        | 23                 | 6.77                        |
| Road             | 21       | 24.50                       | 9                  | 16.83                       |
| Bare soil        | 289      | 44.35                       | 123                | 47.71                       |
| Herb             | 434      | 27.95                       | 186                | 33.61                       |
| CrJ              | 468      | 28.10                       | 200                | 25.38                       |
| AcH-1            | 331      | 39.92                       | 144                | 38.15                       |
| AcH-2            | 112      | 30.63                       | 55                 | 32.54                       |
| AcM-1            | 165      | 29.00                       | 70                 | 29.85                       |
| AcM-2            | 415      | 26.75                       | 184                | 22.15                       |

**Table S2.** Confusion matrix of the pixel based-classification (source: Bley-Dalouman, Broust et al. 2021 [1]).

| Reference                                |        |           |                   |                                                |                                                    |                                            |                                                |         |                  |
|------------------------------------------|--------|-----------|-------------------|------------------------------------------------|----------------------------------------------------|--------------------------------------------|------------------------------------------------|---------|------------------|
|                                          | Herb   | Bare soil | <i>Cryp. jap.</i> | Mature<br><i>Acacia</i><br><i>heterophylla</i> | Non-mature<br><i>Acacia</i><br><i>heterophylla</i> | Mature<br><i>Acacia</i><br><i>mearnsii</i> | Non-mature<br><i>Acacia</i><br><i>mearnsii</i> | Total   | User<br>accuracy |
| Herb                                     | 21,470 | 47        | 8                 | 99                                             | 35                                                 | 186                                        | 70                                             | 21,915  | 0.98             |
| Bare soil                                | 66     | 21,865    | 0                 | 23                                             | 0                                                  | 22                                         | 1                                              | 21,977  | 0.99             |
| <i>Cryptomeria japonica</i>              | 6      | 115       | 19,004            | 659                                            | 520                                                | 740                                        | 2058                                           | 23,102  | 0.82             |
| Mature <i>Acacia heterophylla</i>        | 305    | 136       | 1090              | 20,160                                         | 136                                                | 3909                                       | 2287                                           | 28,023  | 0.71             |
| Non mature<br><i>Acacia heterophylla</i> | 43     | 0         | 98                | 10                                             | 4681                                               | 41                                         | 406                                            | 5279    | 0.88             |
| Mature <i>Acacia mearnsii</i>            | 87     | 39        | 139               | 533                                            | 22                                                 | 2245                                       | 379                                            | 3444    | 0.65             |
| Non mature<br><i>Acacia mearnsii</i>     | 126    | 38        | 1458              | 919                                            | 824                                                | 1219                                       | 12,872                                         | 17,456  | 0.63             |
| Total                                    | 22,103 | 22,240    | 21,797            | 22,403                                         | 6218                                               | 8362                                       | 18,073                                         | 121,196 |                  |
| Producer<br>accuracy                     | 0.97   | 0.98      | 0.87              | 0.9                                            | 0.75                                               | 0.26                                       | 0.71                                           |         |                  |

**Table S3.** Accuracy indicators of the post-classification.

|                      | Shade | Road + Bare<br>soil | Herb | CrJ  | AcH-1 | AcH-2 | AcM-1 | AcM-2 |
|----------------------|-------|---------------------|------|------|-------|-------|-------|-------|
| OA                   |       |                     |      | 0.98 |       |       |       |       |
| Producer<br>accuracy | 1.00  | 1.00                | 1.00 | 1.00 | 0.94  | 1.00  | 1.00  | 1.00  |
| User accuracy        | 1.00  | 1.00                | 1.00 | 1.00 | 1.00  | 0.95  | 0.88  | 0.92  |
| Pchance              |       |                     |      | 0.16 |       |       |       |       |
| Pcorrect             |       |                     |      | 0.98 |       |       |       |       |
| Kappa index          |       |                     |      | 0.97 |       |       |       |       |

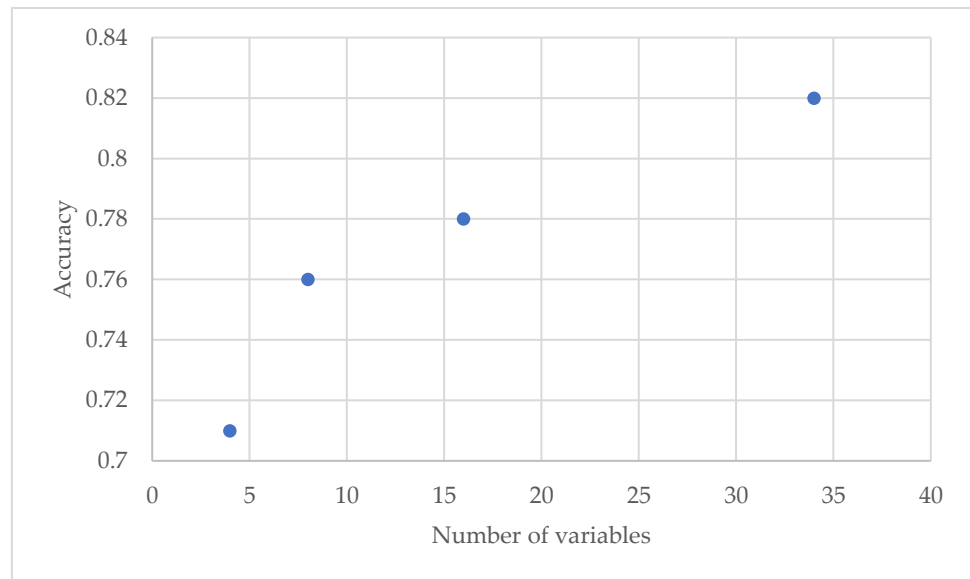

**Figure S1.** Accuracy for  $n$  selected variables on the classification model.

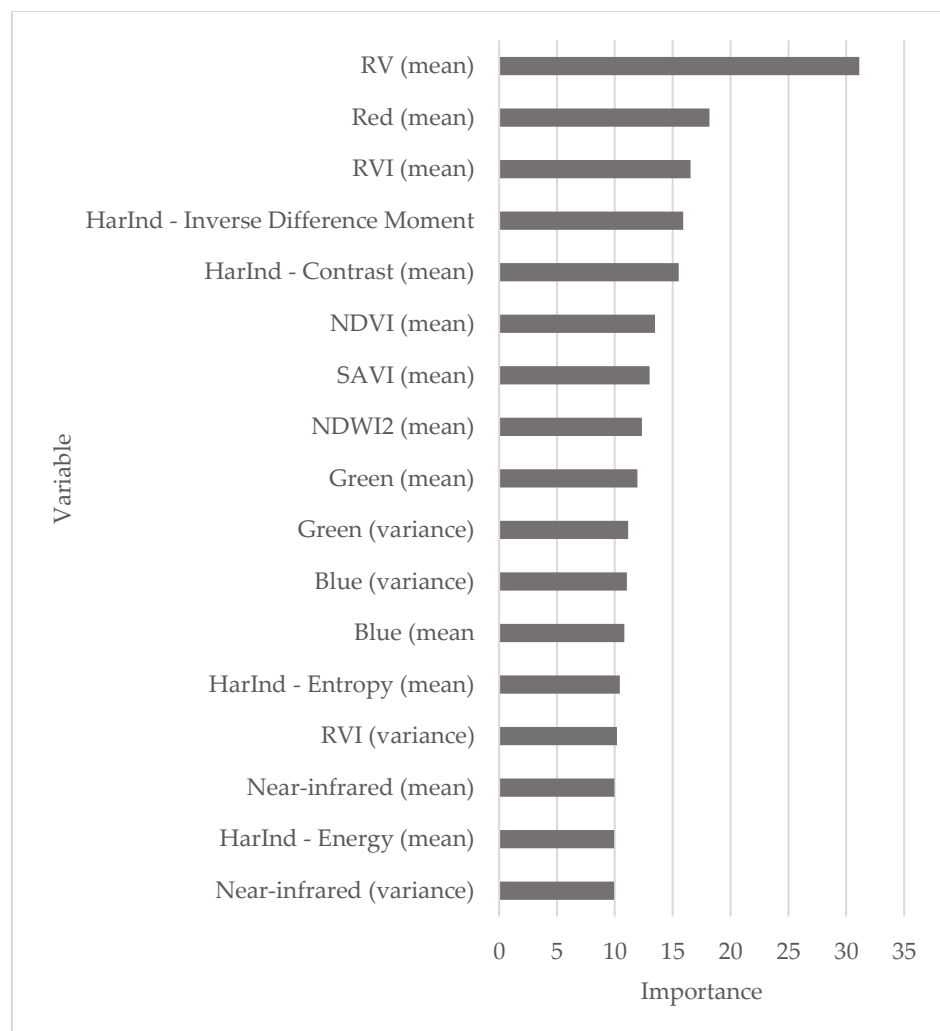

**Figure S2.** Variables of the classification model ranked by importance (HarInd = Haralik indices).

## Reference

1. Bley-Dalouman, H.; Broust, F.; Prevost, J.; Tran, A. Use of very high spatial resolution imagery for mapping wood energy potential from tropical managed forest stands, Reunion Island. *Int. Arch. Photogramm. Remote Sens. Spat. Inf. Sci.* **2021**, XLIII-B3-2021, 189–194. <https://doi.org/10.5194/isprs-archives-XLIII-B3-2021-189-2021>.
